# Supplementary material
Source: Springer Nature journal article supplement (https://www.springermedizin.de/resource/supplementary/13063_2013_1439_MOESM2_ESM.pdf/9620040)

All patients with acute traumatic cervical spinal cord injury (at C5 or below) who are admitted to one of the institutions within 48 hours after injury will be assessed for eligibility.

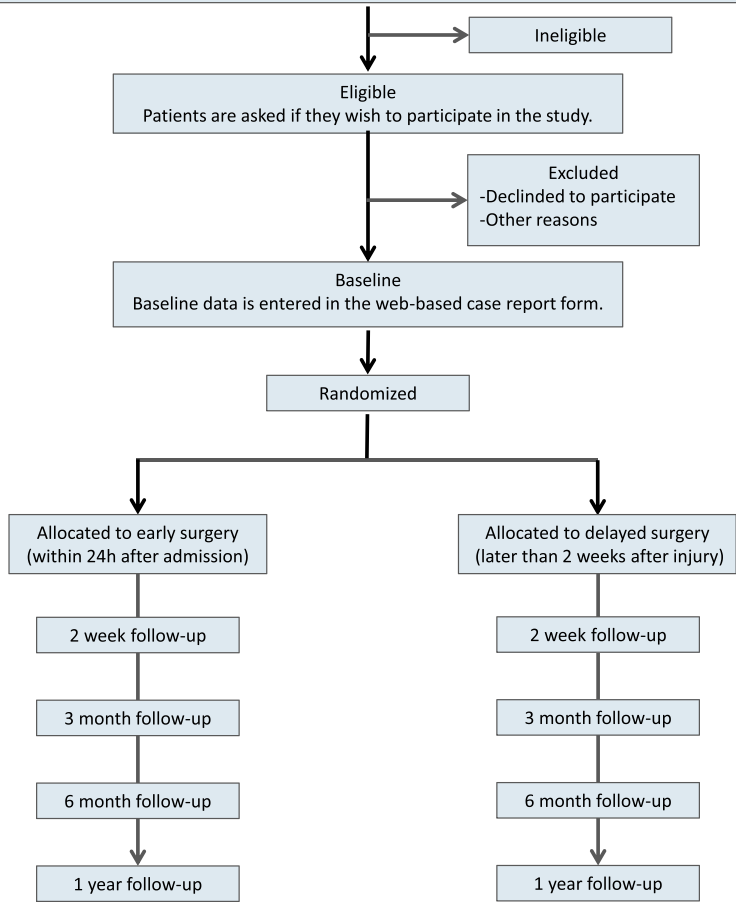

Supplement: MOESM2 [file 9620040]
